# Supplementary material
Source: PubMed Central journal article supplement (PMC1459027)

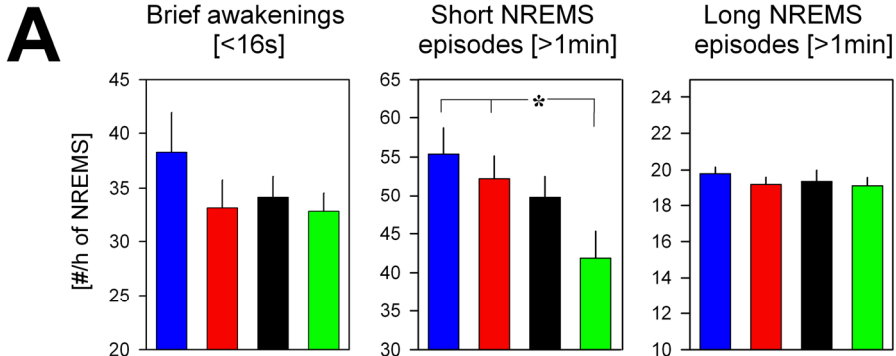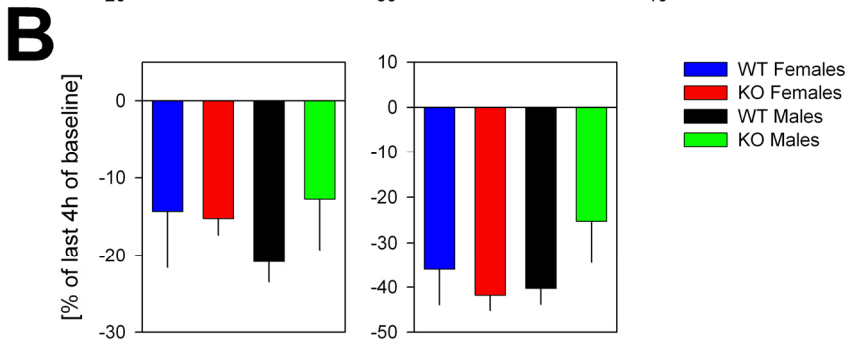

Supplement: pnas_0602006103_1.pdf [file pnas_0602006103_1.pdf]

**A**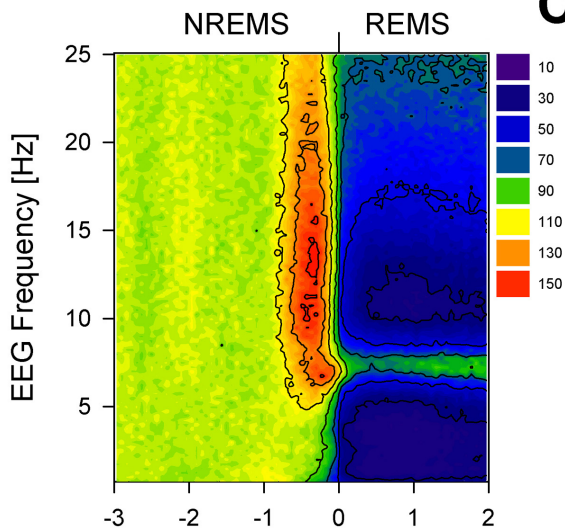**B**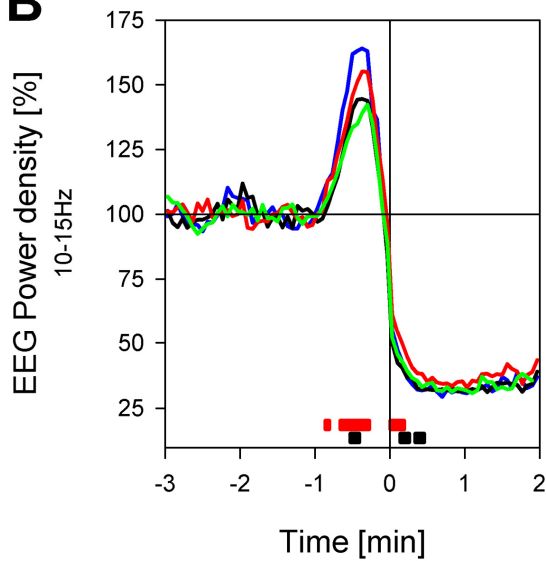**C**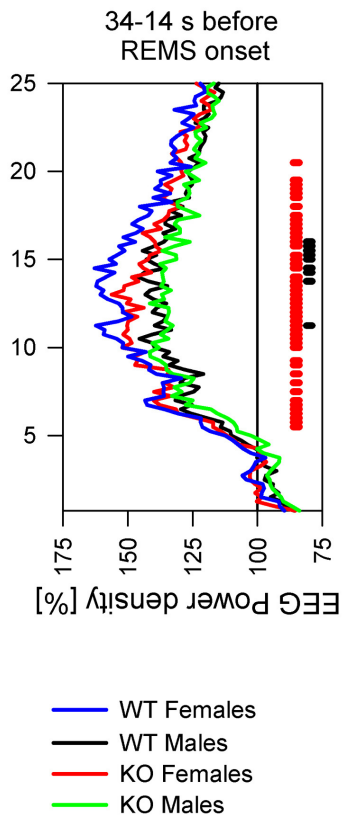

— WT Females  
 — WT Males  
 — KO Females  
 — KO Males

■ Female vs. Male  
 ■ KO vs. WT

Supplement: pnas_0602006103_2.pdf [file pnas_0602006103_2.pdf]

fast-to-slow delta power ratio

[2.25-4.0 Hz / 1.0-2.25 Hz]

BASELINE 1

BASELINE 2

SD

RECOVERY

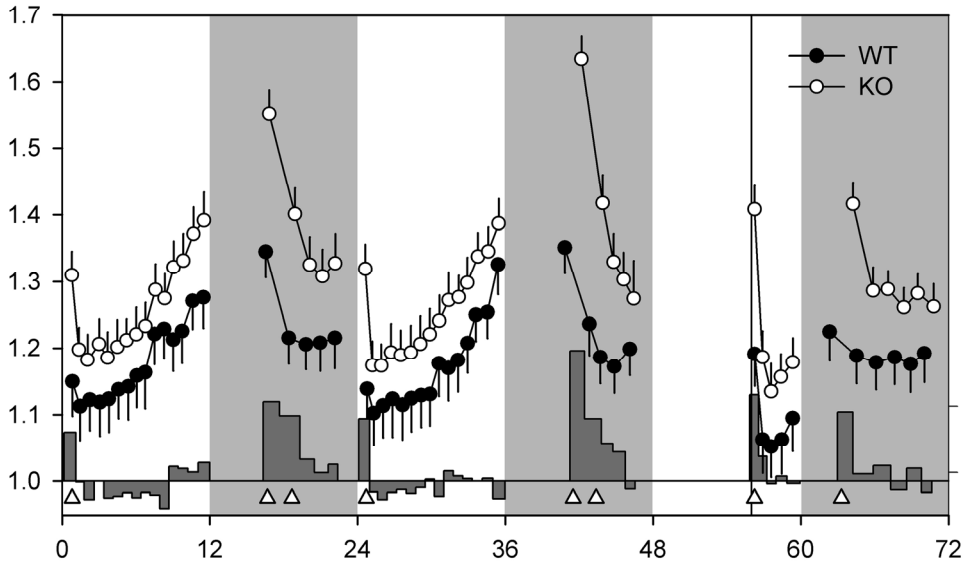

KO-WT  
difference

Time [h]

Supplement: pnas_0602006103_3.pdf [file pnas_0602006103_3.pdf]

# Males

# Females

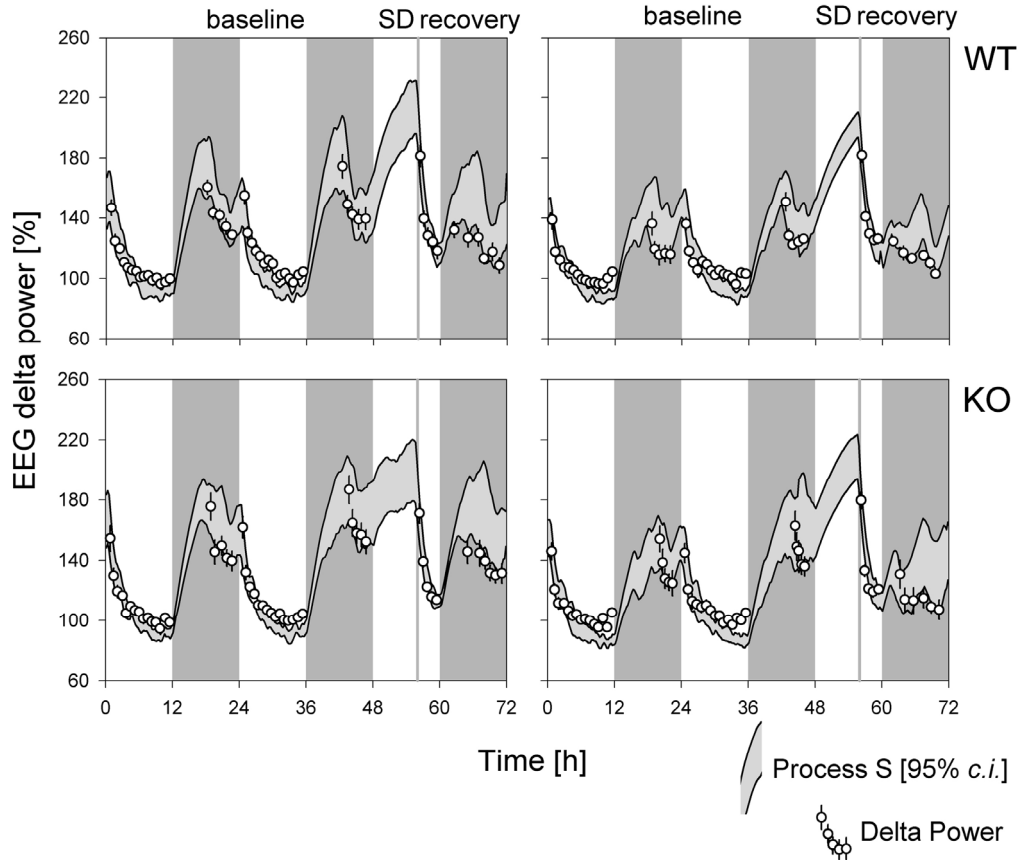

Supplement: pnas_0602006103_4.pdf [file pnas_0602006103_4.pdf]

control

SD

WT

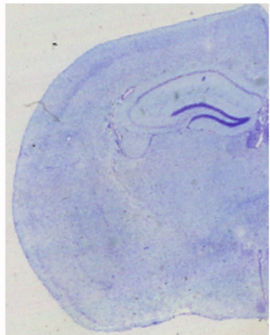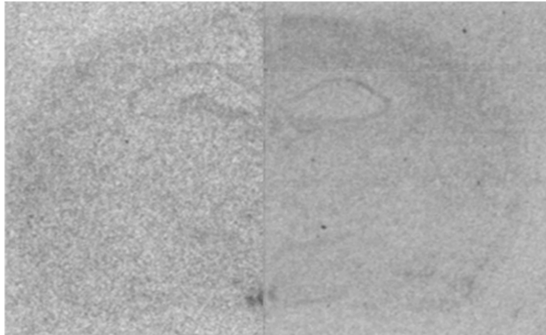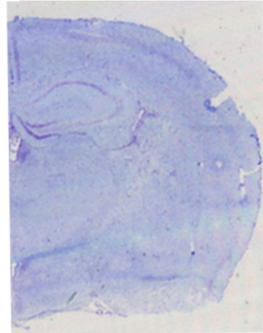

KO

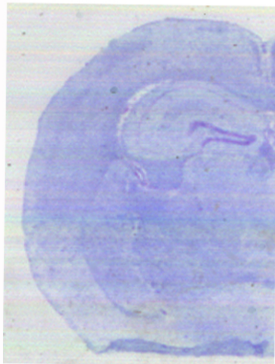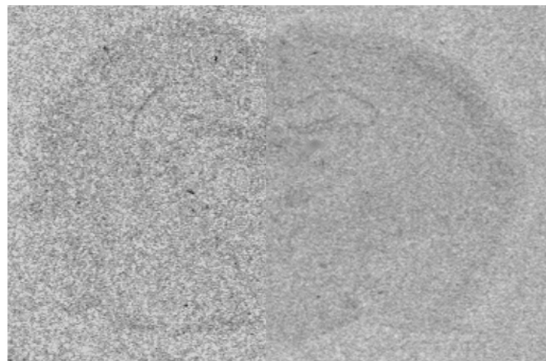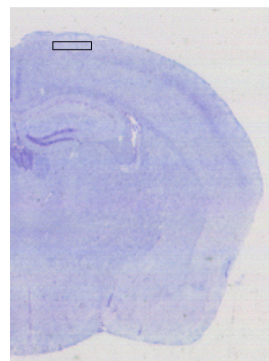

Supplement: pnas_0602006103_5.pdf [file pnas_0602006103_5.pdf]
